# Supplementary material for: Intersectional gender inequalities in access to information, knowledge, and attitudes toward malaria prevention services in Ethiopia: A Mixed- methods study
Source: Research Square preprint supplement (doi:10.21203/rs.3.rs-6846171/v1), 2025-06-25
Supplement: Supplementary file 1 [file 1cab327e93c8125c6efadbcd.docx]

**Table 3: Socio-demographic characteristics of the qualitative study participants, Jimma, Ethiopia, 2024 (N=118)**

|  |  | n (%) |
| --- | --- | --- |
| Age distribution | 20-29 years | 16(13.6%) |
| 30-39 years | 45(40.6%) |
| 40-49 years | 33(27.9%) |
| 50+ years | 24(20.4%) |
| SEX distribution | Male | 55 (46.3%) |
| Female | 63(53.7%) |
| Level of education | No Formal Education | 22(18.7%) |
| Primary Education | 23(19.5%) |
| Secondary Education | 15(12.7%) |
| Diploma | 18(16.61 |
| Degree or Higher | 39(33.1%) |
| Religion | Muslim | 73(61.9%) |
| Orthodox | 34(28.9%) |
| Protestant | 11(9.2%) |
| Role in community | Community Leaders | 25(21.2%) |
| Health Workers | 24(20.3%) |
| Teachers | 8(6.7%) |
| Farmers | 29(24.6%) |
| Housewives | 17(14.4%) |
| Other government workers | 15(12.7%) |
