# Supplementary material for: Intersectional gender inequalities in access to information, knowledge, and attitudes toward malaria prevention services in Ethiopia: A Mixed- methods study
Source: Research Square preprint supplement (doi:10.21203/rs.3.rs-6846171/v1), 2025-06-25
Supplement: Supplementary file 2 [file dd21b220fb0002b120148cbf.docx]

|  | | **Sex** |  | **Total** | **X2-value** | **P-value** |
| --- | --- | --- | --- | --- | --- | --- |
| **Female** | **Male** |
| **Symptoms of malaria** | ***Fever*** | 868(79.9%) | 885(79.6%) | 1753(79.8%) | 0.39 | 0.843 |
| ***Feeling cold*** | 912(84.0%) | 928(83.5%) | 1840(83.7%) | 0.111 | 0.739 |
| ***Headache*** | 839(77.3%) | 862(77.5%) | 1701(77.4%) | 0.22 | 0.883 |
| ***Nausea and Vomiting*** | 359(33.1%) | 378(34.0%) | 737(33.5%) | 0.216 | 0.642 |
| ***Diarrhea*** | 63(5.8%) | 91(8.2%) | 154(7.0%) | 4.786 | 0.029 |
| ***Dizziness*** | 92(8.5%) | 86(7.7%) | 178(8.1%) | 0.402 | 0.526 |
| ***Pale eyes*** | 23(2.1%) | 27(2.4%) | 50(2.3%) | 0.238 | 0.626 |
| ***Body weakness*** | 206(19.0%) | 234(21.0%) | 440(20.0%) | 1.477 | 0.224 |
| **Causes of malaria** | ***Mosquito bites*** | 856(78.8%) | 870(78.2%) | 1726(78.5%) | 0.111 | 0.739 |
| **Malaria prevention** | ***Sleep under a mosquito net)*** | 859(79.1%) | 837(75.3%) | 1696(77.2%) | 4.568 | 0.033 |
| ***Using repellents*** | 93(8.6%) | 109(9.8%) | 202(9.2%) | 1.010 | 0.315 |
| ***Spray house with insecticide*** | 138(12.7%) | 142(12.8%) | 280(12.7%) | 0.002 | 0.965 |
| ***Keep house surroundings clean*** | 732(67.4%) | 745(67.0%) | 1477(67.2%) | 0.041 | 0.839 |
| **Malaria high risk group** | ***A child of under five years old)*** | 943(86.8%) | 962(86.5%) | 1905(86.7%) | 0.049 | 0.824 |
| ***Older boys(6-11)*** | 102(9.4%) | 114(10.3%) | 216(9.8%) | 0.458 | 0.499 |
| ***Older girls(6-11)*** | 103(9.5%) | 114(10.3%) | 217(9.9%) | 0.364 | 0.546 |
| ***Adolescent male*** | 74(6.8%) | 94(8.5%) | 168(7.6%) | 2.091 | 0.148 |
| ***Adolescent female*** | 83(7.6%) | 93(8.4%) | 176(8.0%) | 0387 | 0.534 |
| ***Adult male*** | 95(8.7%) | 101(9.1%) | 196(8.9%) | 0.076 | 0.783 |
| ***Adult female*** | 212(19.5%) | 203(18.3%) | 415(18.9%) | 0.575 | 0.448 |
| ***Pregnant women*** | 520(47.9%) | 539(48.5%) | 1059(48.2%) | 0.076 | 0.782 |
| ***Elderly*** | 373(34.3%) | 394(35.4%) | 767(34.9%) | 0.285 | 0.593 |
| **Mosquito biting time** | ***Day time*** | 47(4.3%) | 51(4.6%) | 98(4.5%) | 0.086 | 0.769 |
| ***Dusk (early evening)*** | 432(39.8%) | 451(40.6%) | 883(40.2%) | 0.139 | 0.710 |
| ***Dawn (early morning)*** | 202(18.6%) | 204(18.3%) | 406(18.5%) | 0.024 | 0.878 |
| ***Mid-night*** | 699(64.4%) | 722(64.9%) | 1421(64.6%) | 0.076 | 0.782 |
| ***Any time*** | 112(10.3%) | 115(10.3%) | 227(10.3%) | 0.000 | 0.982 |
| **Mosquito breeding site** | ***Ponds (stagnant water)*** | 877(80.8%) | 902(81.1%) | 1779(80.9%) | 0.46 | 0.830 |
| ***Plants in Swamps and marshes*** | 331(30.5%) | 343(30.8%) | 674(30.7%) | 0.035 | 0.852 |
| ***Containers that hold water*** | 365(33.6%) | 382(34.4%) | 747(34.0%) | 0.135 | 0.713 |
| ***Bushes/grass*** | 99(9.1%) | 102(9.2%) | 201(9.1%) | 0.002 | 0.963 |
| ***Waste/garbage disposal sites*** | 636(58.6%) | 623(56.0%) | 1259(57.3%) | 1.447 | 0.229 |
| ***Farm animal dwellings*** | 78(7.2%) | 69(6.2%) | 147(6.7%) | 0.841 | 0.359 |
| **Benefit of ITN** | ***Protect mosquito bite*** | 1063(97.9%) | 1096(98.6%) | 2159(98.2%) | 1.453 | 0.228 |
| ***Comfortable sleep*** | 85(7.8%) | 75(6.7%) | 160(7.3%) | 0.953 | 0.329 |
| **Malaria treatment** | ***Home remedies*** | 42(3.9%) | 35(3.1%) | 77(3.5%) | 0.842 | 0.359 |
| ***Traditional medicine*** | 23(2.1%) | 24(2.2%) | 47(2.1%) | 0.004 | 0.948 |
| ***Modern medicine (drugs))*** | 1073(98.8%) | 1097(98.6%) | 2170(98.7%) | 0.101 | 0.751 |
| **Sick from fever/Malaria timing to seek care?** | ***within 24 hour*** | 882(81.2%) | 928(83.5%) | 1810(82.3%) | 1.893 | 0.169 |
