# Supplementary material for: Intersectional gender inequalities in access to information, knowledge, and attitudes toward malaria prevention services in Ethiopia: A Mixed- methods study
Source: Research Square preprint supplement (doi:10.21203/rs.3.rs-6846171/v1), 2025-06-25
Supplement: Supplementary file 3 [file e2b40b9efdcce2fa476e9503.docx]

**Table 8: Sex disparities in attitude items towards malaria preventive methods, HH surveys, Jimma, Ethiopia, 2024**

| **Attitude construct** | **Attitude items** | **Sex** | | **Total** | **X2 –value** | **P-value** |
| --- | --- | --- | --- | --- | --- | --- |
| **Female** | **Male** |
| **Attitude on Malaria services** | *The insecticide on ITNs can be dangerous to people who sleep under them* | 256(23.6%) | 244(22.0%) | 500(22.8%) | 2.261 | 0.323 |
| *It is difficult to sleep well under an ITN when the weather is warm* | 149(13.7%) | 151(13.6%) | 300(13.7%) | 0.36 | 0.982 |
| *These days the chemical on ITN is weak to prevent malaria* | 230(21.2%) | 220(19.8%) | 450(20.5%) | 0.835 | 0.659 |
| *The shape of ITN is convenient for use* | 807(74.4%) | 884(79.6%) | 1691(77. %) | 8.167 | 0.017 |
| *It is only necessary to use an ITN during rainy seasons* | 150(13.8%) | 131(11.8%) | 281(12.8%) | 2.175 | 0.337 |
| *Whenever a family member has a fever, they must be taken to the nearest health facility, immediately.* | 977(90.0%) | 996(89.7%) | 1973(89.9%) | 0.143 | 0.931 |
| *One should not interrupt or share his/her anti-malaria drugs prescribed to him/her by health personnel.* | 149(13.7%) | 183(16.5%) | 332(15.1%) | 4.488 | 0.106 |
| *I trust that the medicines given by health workers cures malaria* | 981(90.4%) | 995(89.6%) | 1976(90.0%) | 0.552 | 0.759 |
| *IRS is harmful to health when sprayed to wall* | 207(19.1%) | 204(18.4%) | 411(18.7%) | 0.511 | 0.775 |
| **Attitude on Women’s engagement** | *Women should participate in Indoor residual spraying (IRS) activities* | 602(55.5%) | 596(53.7%) | 1198(54.6%) | 3.509 | 0.173 |
| *IRS activities are men's job or responsibility* | 425(39.2%) | 441(39.7%) | 866(39.5%) | 1.259 | 0.533 |
| *Females should participate in environmental (village based) cleaning to remove mosquito breeding sites* | 373(34.4%) | 425(38.3%) | 798(36.4%) | 3.631 | 0.163 |
| *Only females should participate in compound cleaning to remove mosquito breeding sites* | 617(56.9%) | 625(56.3%) | 1242(56.6%) | 0.477 | 0.788 |
| **Attitude on malaria susceptibility** | *Waking up early in the morning makes one more vulnerable to malaria* | 491(45.3%) | 472(42.5%) | 963(43.9%) | 1.876 | 0.391 |
| *Going to bed late evening makes one more vulnerable to malaria* | 473(43.6%) | 442(39.8%) | 915(41.7%) | 4.036 | 0.133 |
| *Females are more at risk of acquiring malaria infections* | 671(61.8%) | 664(59.8%) | 1335(60.8%) | 3.040 | 0.219 |
| *Adolescent girls are more susceptible  to malaria than boys* | 586(54.0%) | 567(51.1%) | 1153(52.5%) | 7.976 | 0.019 |
| **Confidence on malaria service access** | *I can easily access information about malaria.* | 359(33.1%) | 375(33.8%) | 734(33.4%) | 4.685 | 0.096 |
| *It is me who often goes to collect ITN when it is distributed through a campaign.* | 634(58.4%) | 646(58.2%) | 1280(58.3%) | 1.524 | 0.467 |
| *It is me who often follow and ensure ITN use my family* | 708(65.3%) | 712(64.1%) | 1420(64.7%) | 2.198 | 0.333 |
| *I am sure that I will visit health facility within 24 hrs for malaria treatment* | 951(87.6%) | 965(86.9%) | 1916(87.3%) | 0.891 | 0.641 |
| *I can decide myself to go to health facility to seek when I get sick from malaria* | 926(85.3%) | 964(86.8%) | 1890(86.1%) | 1.801 | 0.406 |
| **Attitude on Health care providers** | *Health care provider is respectful to me* | 771(71.1%) | 751(67.7%) | 1522(69.3%) | 3.576 | 0.167 |
| *I can openly ask questions or expressing concerns to my health care provider during my malaria treatment?* | 873(80.5%) | 895(80.6%) | 1768(80.5%) | 0.426 | 0.808 |
| *I am not concerned about language barrier while visiting health care facility for care* | 744(68.6%) | 786(70.8%) | 1530(69.7%) | 1.372 | 0.503 |
| *I feel that my health care provider listen to my concerns and needs during my malaria treatment.* | 784(72.3%) | 789(71.1%) | 1573(71.7%) | 0.477 | 0.788 |
| *Health care providers favor males than females while providing service* | 197(18.2%) | 188(16.9%) | 385(17.5%) | 0.643 | 0.725 |
| *Health care providers provide me enough information about my illness and treatment* | 682(62.9%) | 677(61.0%) | 135(961.9%) | 1.743 | 0.418 |
| *I can easily follow the recommendations and advice my health providers give me regarding my malaria treatment.* | 900(82.9%) | 899(81.0%) | 1799(82.0%) | 5.624 | 0.060 |
| *Male health care provider is more respectful and understands me and my concern* | 405(37.3%) | 381(34.3%) | 786(35.8%) | 2.075 | 0.354 |
| *I feel confident and comfortable to seek care because I am insurance payer* | 531(48.9%) | 512(46.1%) | 1043(47.5%) | 1.987 | 0.370 |
| *Health care providers favor non-insured patients while providing care* | 327(30.1%) | 359(32.3%) | 686(31.3%) | 1.218 | 0.544 |
| **Confidence on disclosing illness** | *I feel confident to openly discuss my health concern or illness with my spouse* | 783(87%) | 838(88.2%) | 1621(87.6%) | 1.822 | 0.402 |
